# Supplementary material
Source: publisher figshare collection journal article supplement (https://acs.figshare.com/ndownloader/files/3791512)
Supplement: Supplementary file 1 [file 3791512]

## Supporting Information

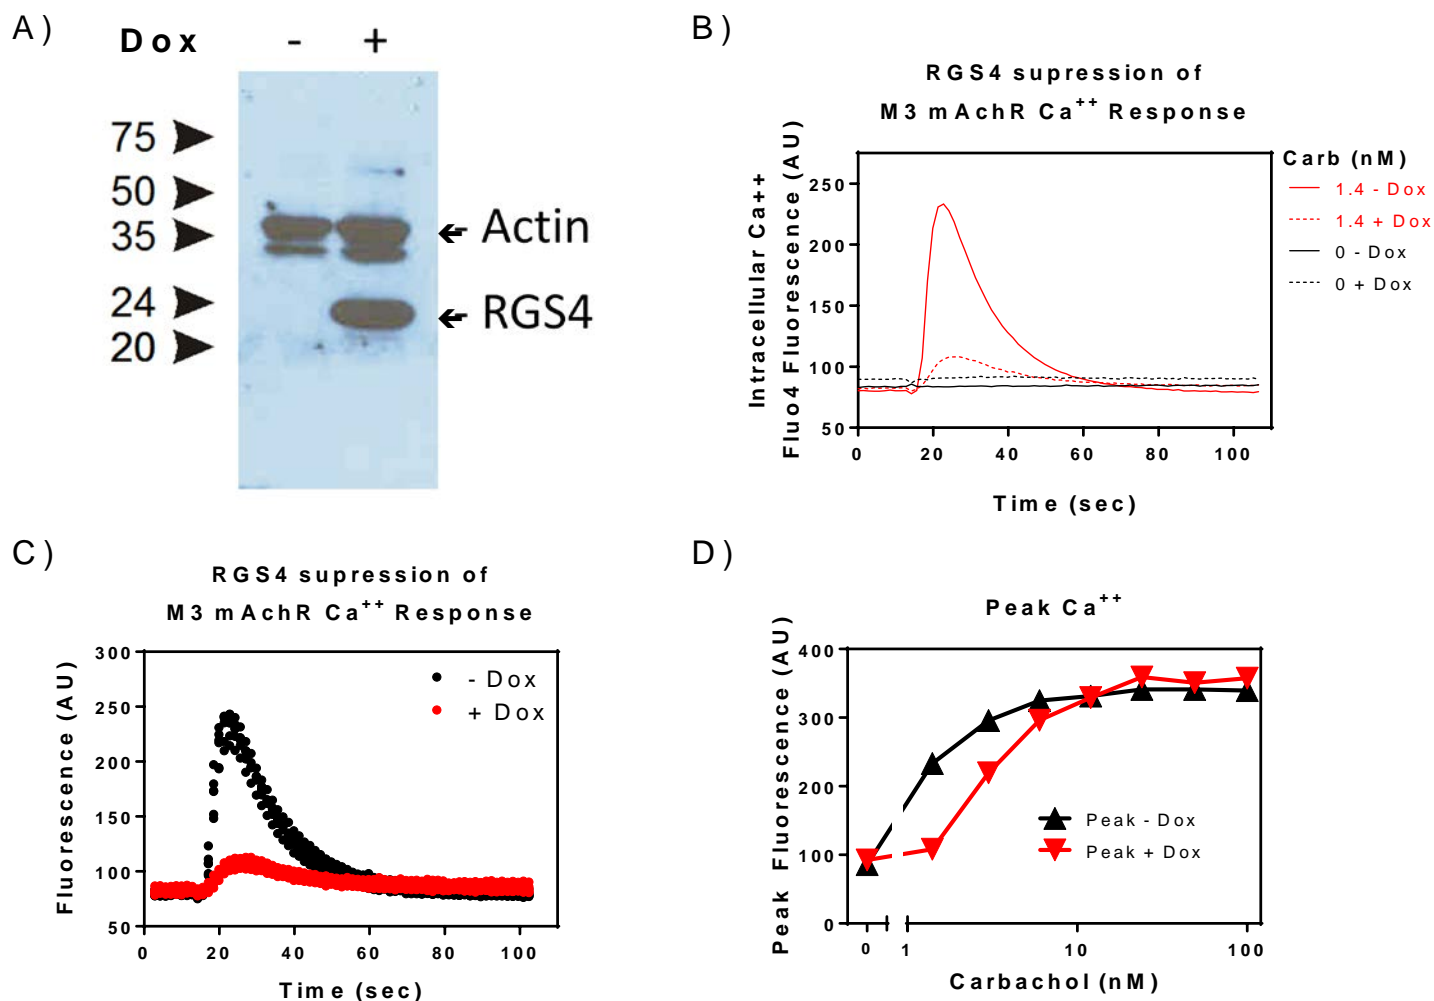

Figure S1. M3-R4 Flp-in cell Calcium measurements. A) M3-R4 cells were treated with or without 1 ug/ml tetracycline for 24 hours. Cells were harvested and Western blots performed using a mixture of anti-HA to detect RGS4 and anti-Actin as a loading control. B-D) Cells were loaded with Fluo4-NW and the indicated concentrations of carbachol were injected into the wells in a Flexstation 3 plate reader. B) Fluorescence measurements were collected every 1.4 seconds and raw values are plotted vs time. Values are mean  $\pm$  SEM of six individual traces. C) Data from 6 individual wells for the 1.4 nM carbachol sample are shown separately with or without Doxycycline induction of RGS4. D) Peak

fluorescence was determined from each sample as a percent of the baseline fluorescence and is plotted vs the concentration of carbachol.
